# Supplementary material for: A Topological Criterion for Filtering Information in Complex Brain Networks
Source: PubMed Central journal article supplement (PMC5268647; doi:10.1371/journal.pcbi.1005305), 2017-01-11
Supplement: pcbi.1005305.s001.pdf [file pcbi.1005305.s001.pdf]

---

## S1 Appendix

### Optimal density maximizing $J$ for regular lattices and random networks.

Global-  $E_g$  and local-efficiency  $E_l$  can be well approximated, respectively, by the inverse of the characteristic path length  $L$  and by the clustering coefficient  $C$  [1]. We can then rewrite the quality function (Eq. 1 in the main text) as  $J = (L^{-1} + C)/\rho$ . In some simple cases,  $L$  and  $C$  can be expressed as a function of the average node degree  $k$  and of the number of nodes  $n$  of a network.

In particular, for large 1D regular lattices, corresponding to Watts-Strogatz (WS) model with a rewiring probability  $p_{ws} = 0$ , we have  $L_0 = \frac{n}{2k}$  and  $C_0 = \frac{3(k-2)}{4(k-1)}$ ; while for large random networks ( $p_{ws} = 1$ ), we have  $L_1 = \frac{\log n}{\log k}$  and  $C_1 = \frac{k}{n}$  [2]. Since the relation  $\rho = \frac{k}{n-1}$  holds for any network, we can rewrite the quality function  $J$  for regular lattices as:

$$J_0 = 2\frac{(n-1)}{n} + \frac{3(n-1)\rho - 6}{4(n-1)\rho^2 - 4\rho} \quad (\text{S1})$$

and for random networks:

$$J_1 = \frac{\log[(n-1)\rho]}{\rho \log n} + \frac{(n-1)}{n} \quad (\text{S2})$$

Notice that the leading contribution to  $J$  is coming from  $C$  in the case of a lattice and from  $L^{-1}$  in the case of a random network.

For these synthetic networks we can determine analytically the optimal value of the connection density  $\rho$  that maximizes the quality function  $J$ . In particular, by deriving with respect to  $\rho$  and equating to zero, we obtained for lattices the following solution which satisfies the requirement of connectedness ( $\rho \geq 2/n$ ):

$$\rho_0 = \frac{2 + \sqrt{2}}{n-1} \quad (\text{S3})$$

As for random networks we obtained:

$$\rho_1 = \frac{e}{n-1} \quad (\text{S4})$$

It follows from Eq. (S3) and Eq. (S4) that in both cases the optimal density maximizing  $J$  can be written as  $c/(n-1)$ , where the constant  $c$ , corresponding to the average node degree  $k$ , is approximately equal to 3. Without loss of generality we referred here to undirected networks. For directed networks the same results hold,  $k$  corresponding to the average node indegree  $k_{in}$  or outdegree  $k_{out}$ .

Indeed, in a directed graph the density is  $\rho = \frac{m}{n(n-1)}$  and  $m = \frac{k_{tot}n}{2}$ , where  $k_{tot} = k_{in} + k_{out}$ . Since in every directed graph  $k_{in} = k_{out}$  we can write, for example,  $k_{tot} = 2k_{in}$ . Hence the density reads as  $\rho = \frac{k_{tot}}{2(n-1)} = \frac{k_{in}}{(n-1)}$  which is the same relation we found for undirected graphs but with  $k_{in}$  instead of  $k$ .

## References

1. Latora V, Marchiori M. Efficient behavior of small-world networks. *Physical Review Letters*. 2001;87(19):198701/1–198701/4.
  2. Watts DJ, Strogatz SH. Collective dynamics of 'small-world' networks. *Nature*. 1998;393(6684):440–442.
-
