# Supplementary material for: A Topological Criterion for Filtering Information in Complex Brain Networks
Source: PubMed Central journal article supplement (PMC5268647; doi:10.1371/journal.pcbi.1005305), 2017-01-11
Supplement: pcbi.1005305.s002.pdf [file pcbi.1005305.s002.pdf]

---

## S2 Appendix

### Optimal density maximizing alternative quality functions.

We considered alternative quality functions combining  $E_g$ ,  $E_l$  and  $\rho$ . For each new  $J$ , we checked analytically the existence of an optimal density maximizing  $J$  in both regular lattices and random networks. We excluded the quality functions for which we obtained indefinite, non-closed or trivial solutions.

- $J = E_g + E_l - \rho \simeq 1/L + C - \rho$

By substituting the expression of  $L$  and  $C$  for random networks we obtain:

$$J_1 = \frac{\log k}{\log n} + \frac{k}{n} - \frac{k}{n-1} \quad (\text{S5})$$

For the sake of simplicity we solved with respect to  $k$ , knowing that  $\rho = k/(n-1)$ . When derivating and equating to zero we had  $k = \frac{n(n-1)}{\log n}$ , which leads to the impossible condition  $\rho = n/\log n > 1$ .

- $J = E_g - \rho \simeq 1/L - \rho$

By using the expression of  $L$  for lattices we obtain:

$$J_0 = \rho \left( 2^{\frac{(n-1)}{n}} - 1 \right) \quad (\text{S6})$$

When derivating and equating to zero we had  $n = 2$  and we cannot solve with respect to  $\rho$ .

- $J = E_l - \rho \simeq C - \rho$

By substituting the expression of  $C$  for random networks we obtain:

$$J_1 = \frac{k}{n} - \frac{k}{n-1} \quad (\text{S7})$$

When derivating and equating to zero we had  $1/n = 1/(n-1)$  and we could not solve with respect to  $\rho$ .

- $J = E_g E_l / \rho \simeq (C/L) / \rho$

By substituting the expression of  $L$  and  $C$  for random networks we obtain:

$$J_1 = \frac{n-1}{n \log n} \log k \quad (\text{S8})$$

When derivating and equating to zero we had the trivial solution  $k = 0$ .

Similarly, it is easy to prove that neither  $J = E_g/\rho$  nor  $J = E_l/\rho$  admitted meaningful solutions in lattices or random networks.

---
