# Supplementary material for: A Topological Criterion for Filtering Information in Complex Brain Networks
Source: PubMed Central journal article supplement (PMC5268647; doi:10.1371/journal.pcbi.1005305), 2017-01-11

---

**Table S 1. Statistics of data fitting  $\rho = c/(n - 1)$  to synthetic networks.**

|       | <b>Lattice</b> | <b>Small-world</b> | <b>Random</b> | <b>Scale-free</b> |
|-------|----------------|--------------------|---------------|-------------------|
| $c$   | 3.265          | 3.258              | 2.966         | 3.215             |
| $R^2$ | 0.999          | 0.997              | 0.993         | 0.998             |

The fit's constant  $c$  and the adjusted  $R^2$  coefficient are reported along different network models.

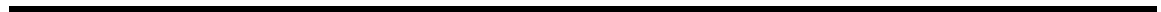

Supplement: pcbi.1005305.s009.pdf [file pcbi.1005305.s009.pdf]
